# Supplementary material for: Mass spectrometry identifies tau C‐terminal phosphorylation cluster during neuronal hyperexcitation
Source: PubMed Central journal article supplement — J Neurochem. 2024 Sep 22;169(1):e16221. doi: 10.1111/jnc.16221 (PMC11658181; doi:10.1111/jnc.16221), 2024-09-22
Supplement: JNC-169-0-s001.pdf [file JNC-169-0-s001.pdf]

# Mass spectrometry identifies tau C-terminal phosphorylation cluster during neuronal hyperexcitation

Amanda Schneeweis, Dawson Hillyer, Tsering Lama, Daeun Kim, Charles Palka, Sarra Djemil, Mai Abdel-Ghani, Kelly Mandella, William Zhu, Nicole Alvarez, Lara Stefansson, Robert Yasuda, Junfeng Ma, and Daniel T.S. Pak\*

## SUPPLEMENTARY FIGURES

Supplementary Figure 1

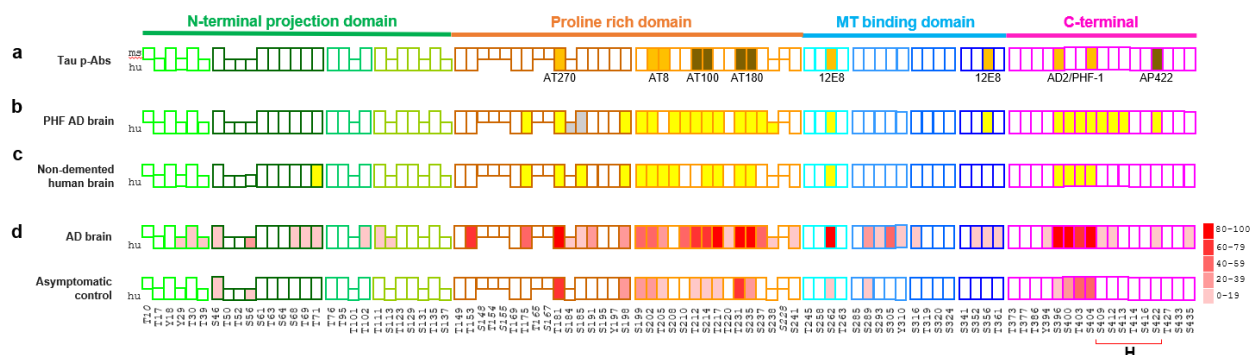

**Supplementary Figure 1. Tau phosphosites identified from selected previously published studies displayed on phosphomaps.** (a) Residues identified with tau phosphospecific antibodies (p-Abs) as indicated under each site (Buée *et al.* 2000). Orange fill, sites reported to be enriched in AD. Brown fill, epitopes exclusive to PHFs. (b) Yellow fill, phosphosites identified by mass spectrometry in PHF from AD brain (Hanger *et al.* 2002). Light gray fill, ambiguous sites. (c) Yellow fill, phosphosites identified by mass spectrometry in normal brain (Funk *et al.* 2014). (d) Phosphorylation sites identified by mass spectrometry in AD and asymptomatic control brain (Wesseling *et al.* 2020). Heat map represents frequency % in AD and control samples.

Hyperexcitation-inducible residues are denoted at bottom by bracket and “H.” Note phosphorylation within this region has previously been observed only in AD and PHF samples.

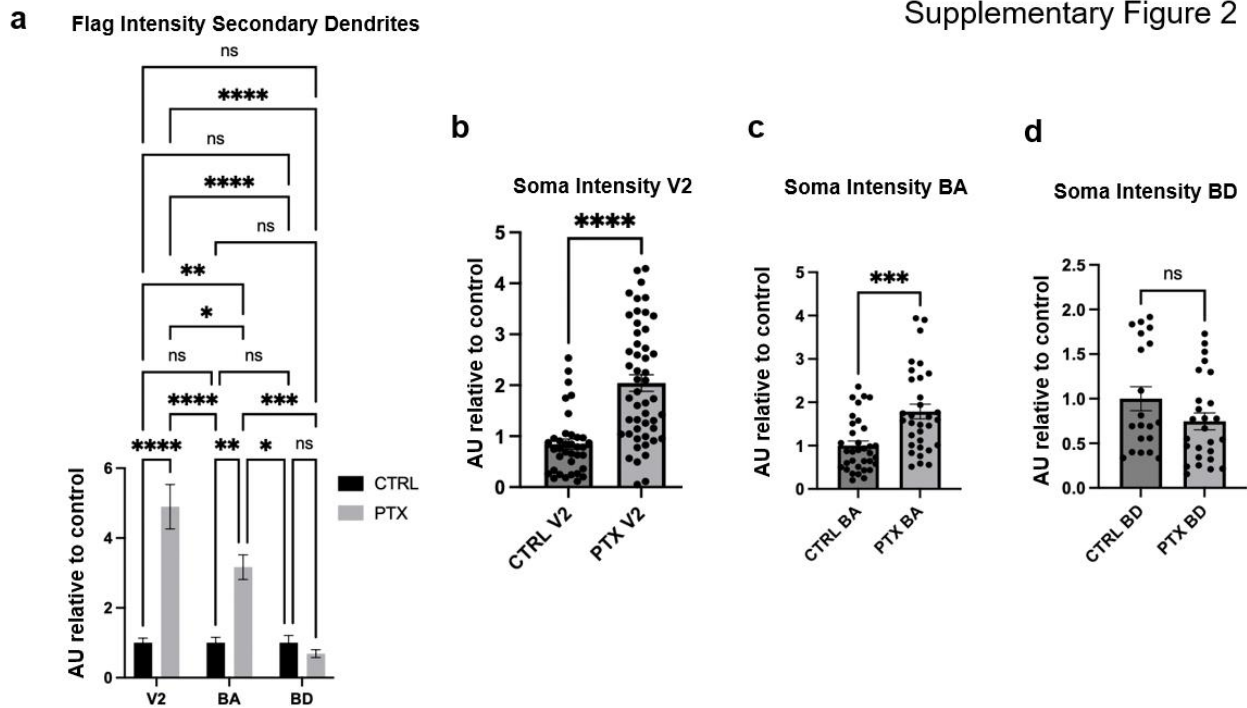

**Supplementary Figure 2. Effects of C-terminal phosphosite mutations on tau localization in secondary dendrites and soma** (a) Two-way ANOVA of Figure 3b. Shapiro Wilks test for normality passed (CTRL,  $p=0.2530$ , PTX,  $p=0.8062$ ). Two-way ANOVA ( $\alpha=0.05$ ) with Šídák's multiple comparisons test was used. V2:CTRL vs. V2:PTX ( $t=7.348$ ,  $p<0.0001$ ), V2:CTRL vs. BA:CTRL ( $t=8.171e-11$ ,  $p=0.0013$ ), V2:PTX vs. BA:PTX ( $t=4.017$ ,  $p=0.0119$ ), V2:CTRL vs. BD:CTRL ( $t=4.126e-010$ ,  $p>0.9999$ ), V2:CTRL vs. BD:PTX ( $t=0.5114$ ,  $p>0.9999$ ), V2:PTX vs. BA: CTRL ( $t=7.029$ ,  $p<0.0001$ ), V2:PTX vs. BA:PTX ( $t=3.408$ ,  $p=0.0119$ ), V2:PTX vs. BD:CTRL ( $t=5.828$ ,  $p<0.0001$ ), V2:PTX vs. BD:PTX ( $t=7.263$ ,  $p<0.0001$ ), BA:CTRL vs. BA:PTX ( $t=3.847$ ,  $p<0.0001$ ), BA:CTRL vs. BD:CTRL ( $t=4.688e-10$ ,  $p>0.9999$ ), BA:CTRL vs.

BD:PTX ( $t=0.4941$ ,  $p>0.9999$ ), BA:PTX vs. BD:CTRL ( $t=3.204$ ,  $p=0.0236$ ), BA:PTX vs. BD:PTX ( $t=4.215$ ,  $p<0.0006$ ), BD:CTRL vs. BD:PTX ( $t=0.4245$ ,  $p>0.9999$ ).  $DF=187$  for all comparisons. **(b)** Soma intensity of Figure 3b V2. ROUT outlier test ( $Q = 1\%$ ). D'Afostino and Pearson test ( $\alpha=0.05$ ) was used to test for normality and did not pass; CTRL and PTX,  $p=0.0044$  and  $p=0.0380$ , respectively). Mann Whitney test used ( $****p<0.0001$ ). **(c)** Soma intensity of Figure 3b BA. ROUT outlier test ( $Q = 1\%$ ). D'Afostino and Pearson test ( $\alpha=0.05$ ) was used to test for normality and did pass; CTRL and PTX,  $p=0.1180$  and  $p=0.1575$ , respectively). T-test used ( $****p=0.0002$ ,  $t=3.993$ ,  $df=64$ ). **(d)** Soma intensity of Figure 3b BD. ROUT outlier test ( $Q = 1\%$ ). D'Afostino and Pearson test ( $\alpha=0.05$ ) was used to test for normality and did not pass; CTRL and PTX,  $p=0.0106$  and  $p=0.2157$ , respectively). Mann Whitney test used (ns,  $p = 0.1244$ ).
